# Supplementary material
Source: publisher site journal article supplement (https://www.dovepress.com/article/443473)
Supplement: Supplementary file 1 [file get_supplementary_file.php]

**Supplementary Material**

**The Danish Atrial Fibrillation Registry. A multidisciplinary national pragmatic initiative for monitoring and supporting quality of care based on data retrieved from administrative registries**

Lars Frost, Albert Marni Joensen, Ulla Dam-Schmidt, Ina Qvist, Margit Brinck, Axel Brandes, Ulla Davidsen, Ole Dyg Pedersen, Dorte Damgaard, Inge Mølgaard, Robert Bedsted, Anders Damgaard Møller Schlünsen, Miriam Grijota Chousa, Julie Andersen, Asger Roer Pedersen, Søren Paaske Johnsen, Nicklas Vinter

**Supplementary Table 1. Coding of indicators based on registry information**

| **Indicator** | **Registry** | **Variable** | **Variable type** | **Codes** |
| --- | --- | --- | --- | --- |
|  |  |  |  |  |
| Echocardiography in hospital | The Danish National Patient Registry | Echocardiography | Procedure code | UXUC80,  UXUC80B, UXUC80C,  UXUC80D,  UXUC80E,  UXUC81,  UXUC81C |
| Echocardiography in private cardiology practice | The National Health Insurance Service Registry | Echocardiography | Procedure  code | 2208, 3810,  3811, 5101,  5102, 5103, 6402, 6408,  0906 |
| Thyroid Stimulating Hormone (TSH) | Clinical Laboratory Information System Research Database (LABKA) | Thyroid Stimulating Hormone (TSH) | Nomenclature, Properties and Units coding system (NPU) | NPU03577,  NPU27547, NPU04199, NPU04200, NPU03624, NPU03578 |
| Patient education | The Danish National Patient Registry | Patient education | Procedure code | BFKB |
| Measurement of kidney function (p-creatinine) | Clinical Laboratory Information System Research Database (LABKA) | p-creatinine | Nomenclature, Properties and Units coding system (NPU) | NPU04998  NPU18016 |
| Oral anticoagulation (OAC) treatment, initiation and persistence | The Register of Pharmaceutical Sales | OAC | Anatomical Therapeutic Chemical (ATC) Classification | B01AA, B01AE07,  B01AF01,  B01AF02,  B01AF03 |
| Incidence of ischemic stroke | The Danish Stroke Registry | Ischemic stroke | International  Classification  Of Disease (ICD-10) | DI63-DI64 |
| Incidence Intracranial haemorrhage | The Danish National Patient Registry | Intracranial haemorrhage | International  Classification  Of Disease (ICD-10) | DI60-DI62, DS064-DS066 |
| Major bleeding (international society on thrombosis and haemostasis) | The Danish National Patient Registry | Major bleeding | International  Classification  Of Disease (ICD-10) | DI60-DI62, DS064-DS066, DK25.0, DK25.2, DK25.4, DK25.6, DK26.0, DK26.2, DK26.4, DK26.6, DK27.0, DK27.2, DK27.4, DK27.6, DK28.0, DK28.2, DK28.4, DK28.6, K29.8A, DK92.1, DK92.2, DJ942 |

**Supplementary Table 2. Proportion of incident patients with atrial fibrillation having an echocardiogram**

|  | **2017** | **2018** | **2019** | **2020** | **2021** |
| --- | --- | --- | --- | --- | --- |
| **Denmark** |  |  |  |  |  |
| Numbers (yes/total) | 8844/22147 | 9345/20737 | 16765/21397 | 166445/20345 | 17398/21072 |
| Percentage (95% CI) | 39.9 (39.3-40.6) | 45.1 (44.4-45.7) | 78.4 (77.8-78.9) | 81.8 (81.3-82.3) | 82.6 (82.1-83.1) |
| **Capital Region** |  |  |  |  |  |
| Numbers (yes/total) | 2627/6335 | 2711/6080 | 4233/5861 | 4090/5470 | 4227/5531 |
| Percentage (95% CI) | 41.5 (40.3-42.7) | 44.6 (43.3-45.9) | 72.2 (71.1-73.4) | 74.8 (73.6-75.9) | 76.4 (75.3-77.5) |
| **Zealand Region** |  |  |  |  |  |
| Numbers (yes/total) | 1475/3946 | 1431/3171 | 2744/3523 | 2744/3424 | 2960/3585 |
| Percentage (95% CI) | 37.4 (35.9-38.9) | 45.1 (43.4-46.9) | 77.9 (76.5-79.3) | 80.1 (78.8-81.5) | 82.6 (81.3-83.8) |
| **South Region** |  |  |  |  |  |
| Numbers (yes/total) | 1892/4930 | 2127/4797 | 4052/5114 | 4051/4885 | 4157/5033 |
| Percentage (95% CI) | 38.4 (37.0-39.8) | 44.3 (42.9-45.8) | 79.2 (78.1-80.3) | 82.9 (81.8-84.0) | 82.6 (81.5-83.6) |
| **Central Region** |  |  |  |  |  |
| Numbers (yes/total) | 1948/4526 | 2070/4355 | 3946/4576 | 3908/4323 | 4214/4659 |
| Percentage (95% CI) | 43.0 (41.6-44.5) | 47.5 (46.0-49.0) | 86.2 (85.2-87.2) | 90.4 (89.5-91.3) | 90.5 (89.6-91.3) |
| **North Region** |  |  |  |  |  |
| Numbers (yes/total) | 902/2410 | 1006/2334 | 1778/2311 | 1852/2243 | 1840/2264 |
| Percentage (95% CI) | 37.4 (35.5-39.4) | 43.1 (41.1-45.1) | 76.9 (75.2-78.6) | 82.6 (80.9-84.1) | 81.3 (79.6-82.9) |

**Supplementary Table 3. Proportion of incident patients with atrial fibrillation having patient education**

|  | **2017** | **2018** | **2019** | **2020** | **2021** |
| --- | --- | --- | --- | --- | --- |
| **Denmark** |  |  |  |  |  |
| Numbers (yes/total) | 4351/22143 | 4769/20738 | 6691/21392 | 6220/20346 | 6470/21072 |
| Percentage (95% CI) | 19.7 (19.1-20.2) | 23.0 (22.4-23.6) | 31.3 (30.7-31.9) | 30.6 (29.9-31.2) | 30.7 (30.1-31.3) |
| **Capital Region** |  |  |  |  |  |
| Numbers (yes/total) | 1209/6335 | 1236/6080 | 1730/5857 | 1509/5472 | 1543/5532 |
| Percentage (95% CI) | 19.1 (18.1-20.1) | 20.3 (19.3-21.4) | 29.5 (28.4-30.7) | 27.6 (26.4-28.8) | 27.9 (26.7-29.1) |
| **Zealand Region** |  |  |  |  |  |
| Numbers (yes/total) | 756/3946 | 781/3171 | 1211/3522 | 1106/3424 | 1094/3583 |
| Percentage (95% CI) | 19.2 (17.9-20.4) | 24.6 (23.1-26.2) | 34.4 (32.8-36.0) | 32.3 (30.7-33.9) | 30.5 (29.0-32.1) |
| **South Region** |  |  |  |  |  |
| Numbers (yes/total) | 905/4929 | 1023/4797 | 1705/5114 | 1646/4884 | 1587/5032 |
| Percentage (95% CI) | 18.4 (17.3-19.5) | 21.3 (20.2-22.5) | 33.3 (32.1-34.7) | 33.7 (32.4-35.1) | 31.5 (30.3-32.8) |
| **Central Region** |  |  |  |  |  |
| Numbers (yes/total) | 1131/4523 | 1336/4355 | 1425/4577 | 1358/4323 | 1683/4661 |
| Percentage (95% CI) | 25.0 (23.8-26.3) | 30.7 (29.3-32.1) | 31.1 (29.8-32.5) | 31.4 (30.0-32.8) | 36.1 (34.7-37.5) |
| **North Region** |  |  |  |  |  |
| Numbers (yes/total) | 350/2410 | 393/2335 | 617/2310 | 601/2243 | 563/2264 |
| Percentage (95% CI) | 14.5 (13.1-16.0) | 16.8 (15.3-18.4) | 26.7 (24.9-28.6) | 26.8 (25.0-28.7) | 24.9 (23.1-26.7) |

**Supplementary Table 4. Proportion of incident patients with atrial fibrillation having a measurement of thyroid stimulating hormone**

|  | **2017** | **2018** | **2019** | **2020** | **2021** |
| --- | --- | --- | --- | --- | --- |
| **Denmark** |  |  |  |  |  |
| Numbers (yes/total) | 14496/22147 | 15618/20736 | 15140/21397 | 15164/20345 | 16130/21072 |
| Percentage (95% CI) | 65.5 (64.8-66.1) | 75.3 (74.7-75.9) | 70.8 (70.1-71.4) | 74.5 (73.9-75.1) | 76.6 (76.0-77.1) |
| **Capital Region** |  |  |  |  |  |
| Numbers (yes/total) | 4677/6335 | 4736/6080 | 4469/5861 | 4449/5468 | 4502/5531 |
| Percentage (95% CI) | 73.8 (72.7-74.9) | 77.9 (76.8-79.0) | 76.3 (75.1-77.3) | 81.3 (80.3-82.4) | 81.4 (80.3-82.4) |
| **Zealand Region** |  |  |  |  |  |
| Numbers (yes/total) | 3023/3946 | 2261/3171 | 2283/3523 | 2460/3424 | 2657/3585 |
| Percentage (95% CI) | 76.6 (75.3-77.9) | 71.3 (69.7-72.9) | 64.8 (63.2-66.4) | 71.9 (70.3-73.4) | 74.1 (72.7-75.5) |
| **South Region** |  |  |  |  |  |
| Numbers (yes/total) | 1446/4930 | 3416/4797 | 3313/5114 | 3309/4885 | 3593/5033 |
| Percentage (95% CI) | 29.3 (28.1-30.6) | 71.2 (69.9-72.5) | 64.8 (63.5-66.1) | 67.8 (66.4-69.1) | 71.4 (70.1-72.6) |
| **Central Region** |  |  |  |  |  |
| Numbers (yes/total) | 3688/4526 | 3579/4355 | 3575/4576 | 3451/4323 | 3798/4659 |
| Percentage (95% CI) | 81.5 (80.3-82.6) | 82.2 (81.0-83.3) | 78.1 (76.9-79.3) | 79.8 (78.6-81.0) | 81.5 (80.4-82.6) |
| **North Region** |  |  |  |  |  |
| Numbers (yes/total) | 1662/2410 | 1626/2334 | 1497/2311 | 1495/2243 | 1580/2264 |
| Percentage (95% CI) | 69.0 (67.1-70.8) | 69.7 (67.8-71.5) | 64.8 (62.8-66.7) | 66.7 (64.7-68.6) | 69.8 (67.9-71.7) |

**Supplementary Table 5. Proportion of patients on treatment by direct oral anticoagulants having at least one annual measurement of plasma creatinine**

|  | **2017** | **2018** | **2019** | **2020** | **2021** |
| --- | --- | --- | --- | --- | --- |
| **Denmark** |  |  |  |  |  |
| Numbers (yes/total) | 55140/59243 | 63775/68967 | 74189/80629 | 80893/87284 | 86275/92915 |
| Percentage (95% CI) | 93.1 (92.9-93.3) | 92.5 (92.3-92.7) | 92.0 (91.8-92.2) | 92.7 (92.5-92.9) | 92.9 (92.7-93.0) |
| **Capital Region** |  |  |  |  |  |
| Numbers (yes/total) | 16923/18439 | 18748/20433 | 21030/23253 | 22358/24534 | 23350/25580 |
| Percentage (95% CI) | 91.8 (91.4-92.2) | 91.8 (91.4-92.1) | 90.4 (90.1-90.8) | 91.1 (90.8-91.5) | 91.3 (90.9-91.6) |
| **Zealand Region** |  |  |  |  |  |
| Numbers (yes/total) | 8661/9339 | 1068/11158 | 11522/12638 | 12750/13907 | 13887/15085 |
| Percentage (95% CI) | 92.7 (92.2-93.3) | 90.2 (89.7-90.8) | 91.2 (90.7-91.7) | 91.7 (91.2-92.1) | 92.1 (91.6-92.5) |
| **South Region** |  |  |  |  |  |
| Numbers (yes/total) | 11883/12684 | 14021/15152 | 16698/18034 | 18455/19790 | 19953/21320 |
| Percentage (95% CI) | 93.7 (93.3-94.1) | 92.5 (92.1-93.0) | 92.6 (92.2-93.0) | 93.3 (92.9-93.6) | 93.6 (93.4-93.9) |
| **Central Region** |  |  |  |  |  |
| Numbers (yes/total) | 11414/12124 | 13508/14342 | 16390/17563 | 17874/19091 | 19110/20401 |
| Percentage (95% CI) | 94.1 (93.5-94.6) | 94.2 (93.8-94.6) | 93.3 (92.9-93.7) | 93.6 (93.3-94.0) | 93.7 (93.3-94.0) |
| **North Region** |  |  |  |  |  |
| Numbers (yes/total) | 6259/6654 | 7430/7882 | 8549/9141 | 9455/9960 | 9974/10528 |
| Percentage (95% CI) | 94.1 (93.5-94.6) | 94.3 (93.7-94.8) | 93.5 (93.0-94.0) | 94.9 (94.5-95.4) | 94.7 (94.3-95.2) |

**Supplementary Table 6. Percentage of incident patients with atrial fibrillation with a CHA2DS2-VASc score of ≥1 in men and ≥2 in women initiating oral anticoagulation**

|  | **2017** | **2018** | **2019** | **2020** | **2021** |
| --- | --- | --- | --- | --- | --- |
| **Denmark** |  |  |  |  |  |
| Numbers (yes/total) | 10028/11763 | 9786/11152 | 10294/11617 | 9685/10901 | 10157/11233 |
| Percentage (95% CI) | 85.3 (84.6-85.9) | 87.8 (87.1-88.4) | 88.6 (88.0-89.2) | 88.9 (88.2-89.4) | 90.4 (89.9-91.0) |
| **Capital Region** |  |  |  |  |  |
| Numbers (yes/total) | 2683/3243 | 2660/3146 | 2633/3036 | 2443/2833 | 2483/2807 |
| Percentage (95% CI) | 82.7 (81.4-84.0) | 84.6 (83.2-85.8) | 86.7 (85.5-87.9) | 86.2 (84.9-87.5) | 88.5 (87.2-89.6) |
| **Zealand Region** |  |  |  |  |  |
| Numbers (yes/total) | 1753/2205 | 1509/1743 | 1723/1993 | 1660/1894 | 1741/1962 |
| Percentage (95% CI) | 79.5 (77.8-81.2) | 86.6 (84.9-88.1) | 86.5 (84.9-87.9) | 87.7 (86.1-89.1) | 88.7 (87.3-90.1) |
| **South Region** |  |  |  |  |  |
| Numbers (yes/total) | 2384/2702 | 2418/2715 | 2571/2874 | 2473/2727 | 2564/2843 |
| Percentage (95% CI) | 88.2 (87.0-89.4) | 89.1 (87.8-90.2) | 89.5 (88.3-90.6) | 90.7 (89.5-91.8) | 90.2 (89.0-91.3) |
| **Central Region** |  |  |  |  |  |
| Numbers (yes/total) | 2037/2307 | 2017/2266 | 2191/2416 | 2021/2245 | 2234/2402 |
| Percentage (95% CI) | 88.3 (86.9-89.6) | 89.0 (87.7-90.3) | 90.7 (89.5-91.8) | 90.0 (88.7-91.2) | 93.0 (91.9-94.0) |
| **North Region** |  |  |  |  |  |
| Numbers (yes/total) | 1171/1306 | 1182/1282 | 1169/1293 | 1088/1202 | 1135/1219 |
| Percentage (95% CI) | 89.7 (87.9-91.3) | 92.2 (90.6-93.6) | 90.4 (88.7-92.0) | 90.5 (88.7-92.1) | 93.1 (91.5-94.5) |

**Supplementary Table 7. One-year adherence to oral anticoagulation. Percentage of incident patients with**

**atrial fibrillation with a CHA2DS2-VASc score of ≥1 in men and ≥2 in women**

|  | **2017** | **2018** | **2019** | **2020** |
| --- | --- | --- | --- | --- |
| **Denmark** |  |  |  |  |
| Numbers (yes/total) | 8565/10054 | 8288/9518 | 8801/10017 | 8298/9358 |
| Percentage (95% CI) | 85.2 (84.5-85.9) | 87.1 (86.4-87.7) | 87.9 (87.2-88.5) | 88.7 (88.0-89.3) |
| **Capital Region** |  |  |  |  |
| Numbers (yes/total) | 2332/2830 | 2245/2670 | 2238/2607 | 2110/2411 |
| Percentage (95% CI) | 82.4 (81.0-83.8) | 84.1 (82.6-85.5) | 85.9 (84.5-87.2) | 87.5 (86.1-88.8) |
| **Zealand Region** |  |  |  |  |
| Numbers (yes/total) | 1545/1883 | 1288/1504 | 1480/1711 | 1404/1613 |
| Percentage (95% CI) | 82.1 (80.2-83.8) | 85.6 (83.8-87.4) | 86.5 (84.8-88.1) | 87.0 (85.3-88.6) |
| **South Region** |  |  |  |  |
| Numbers (yes/total) | 1968/2247 | 2063/2323 | 2194/2485 | 2105/2337 |
| Percentage (95% CI) | 87.6 (86.2-88.9) | 88.8 (87.5-90.1) | 88.3 (87.0-89.5) | 90.1 (88.8-91.3) |
| **Central Region** |  |  |  |  |
| Numbers (yes/total) | 1727/1990 | 1710/1948 | 1886/2111 | 1728/1950 |
| Percentage (95% CI) | 86.8 (85.2-88.2) | 87.8 (86.3-89.2) | 89.3 (88.0-90.6) | 88.6 (87.1-90.0) |
| **North Region** |  |  |  |  |
| Numbers (yes/total) | 933/1104 | 982/1073 | 996/1096 | 951/1046 |
| Percentage (95% CI) | 90.0 (88.0-91.7) | 91.5 (89.7-93.1) | 90.9 (89.0-92.5) | 90.9 (89.0-92.6) |

**Supplementary Table 8. Two-year adherence to oral anticoagulation, Percentage of**

**incident patients with atrial fibrillation with a CHA2DS2-VASc score of ≥1 in men**

**and ≥2 in women**

|  | **2017** | **2018** | **2019** |
| --- | --- | --- | --- |
| **Denmark** |  |  |  |
| Numbers (yes/total) | 7749/9070 | 7456/8554 | 7941/9005 |
| Percentage (95% CI) | 85.4 (84.7-86.2) | 87.2 (86.4-87.9) | 88.2 (87.5-88.8) |
| **Capital Region** |  |  |  |
| Numbers (yes/total) | 2094/2549 | 2018/2409 | 2034/2340 |
| Percentage (95% CI) | 82.2 (80.6-83.6) | 83.8 (82.2-85.2) | 86.9 (85.5-88.3) |
| **Zealand Region** |  |  |  |
| Numbers (yes/total) | 1401/1711 | 1154/1339 | 1339/1548 |
| Percentage (95% CI) | 81.9 (80.0-83.7) | 86.2 (84.2-88.0) | 86.5 (84.7-88.2) |
| **South Region** |  |  |  |
| Numbers (yes/total) | 1760/2001 | 1882/2108 | 1967/2222 |
| Percentage (95% CI) | 88.0 (86.5-89.4) | 89.3 (87.9-90.6) | 88.5 (87.1-89.8) |
| **Central Region** |  |  |  |
| Numbers (yes/total) | 1589/1801 | 1538/1751 | 1701/1904 |
| Percentage (95% CI) | 88.2 (86.7-89.7) | 87.8 (86.2-89.3) | 89.3 (87.9-90.7) |
| **North Region** |  |  |  |
| Numbers (yes/total) | 905/1008 | 864/947 | 893/984 |
| Percentage (95% CI) | 89.8 (87.7-91.6) | 91.2 (89.3-93.0) | 90.8 (88.8-92.5) |

**Supplementary Table 9. One-year incidence of ischemic stroke in patients with prevalent atrial fibrillation**

|  | **2017** | **2018** | **2019** | **2020** | **2021** |
| --- | --- | --- | --- | --- | --- |
| **Denmark** |  |  |  |  |  |
| Numbers (yes/total) | 1132/129171 | 1101/127722 | 1098/132871 | 1114/133060 | 946/133661 |
| Percentage (95% CI) | 0.88 (0.83-0.93) | 0.86 (0.81-0.91) | 0.83 (0.78-0.88) | 0.84 (0.79-0.89) | 0.71 (0.66-0.75) |
| **Capital Region** |  |  |  |  |  |
| Numbers (yes/total) | 390/37510 | 363/36603 | 347/37846 | 388/37462 | 316/37093 |
| Percentage (95% CI) | 1.04 (0.94-1.15) | 0.99 (0.89-1.10) | 0.92 (0.82-1.02) | 1.04 (0.94-1.14) | 0.85 (0.76-0.95) |
| **Zealand Region** |  |  |  |  |  |
| Numbers (yes/total) | 195/21637 | 197/21639 | 192/21747 | 171/21833 | 160/22183 |
| Percentage (95% CI) | 0.90 (0.78-1.04) | 0.91 (0.79-1.05) | 0.88 (0.76-1.02) | 0.78 (0.67-0.91) | 0.72 (0.61-0.84) |
| **South Region** |  |  |  |  |  |
| Numbers (yes/total) | 195/28185 | 183/28194 | 212/29693 | 216/30086 | 161/30602 |
| Percentage (95% CI) | 0.69 (0.60-0.80) | 0.65 (0.56-0.75) | 0.71 (0.62-0.82) | 0.72 (0.63-0.82) | 0.53 (0.45-0.61) |
| **Central Region** |  |  |  |  |  |
| Numbers (yes/total) | 239/27803 | 245/27387 | 240/29140 | 216/29221 | 213/29272 |
| Percentage (95% CI) | 0.86 (0.75-0.98) | 0.89 (0.79-1.01) | 0.82 (0.72-0.93) | 0.74 (0.64-0.84) | 0.73 (0.63-0.83) |
| **North Region** |  |  |  |  |  |
| Numbers (yes/total) | 113/14021 | 113/13883 | 107/14431 | 123/14446 | 96/14500 |
| Percentage (95% CI) | 0.81 (0.66-0.97) | 0.81 (0.67-0.98) | 0.74 (0.61-0.90) | 0.85 (0.71-1.02) | 0.66 (0.54-0.81) |

**Supplementary Table 10. One-year incidence of intracranial bleeding in patients with prevalent atrial fibrillation**

|  | **2017** | **2018** | **2019** | **2020** | **2021** |
| --- | --- | --- | --- | --- | --- |
| **Denmark** |  |  |  |  |  |
| Numbers (yes/total) | 731/129171 | 726/127722 | 739/132871 | 758/133060 | 726/133661 |
| Percentage (95% CI) | 0.57 (0.53-0.61) | 0.57 (0.53-0.61) | 0.56 (0.52-0.60) | 0.57 (0.53-0.61) | 0.54 (0.50-0.58) |
| **Capital Region** |  |  |  |  |  |
| Numbers (yes/total) | 217/37510 | 215/36603 | 234/37846 | 244/37462 | 232/37093 |
| Percentage (95% CI) | 0.58 (0.50-0.66) | 0.59 (0.51-0.67) | 0.62 (0.54-0.70) | 0.65 (0.57-0.74) | 0.63 (0.55-0.71) |
| **Zealand Region** |  |  |  |  |  |
| Numbers (yes/total) | 127/21637 | 108/21639 | 109/21747 | 117/21833 | 119/22183 |
| Percentage (95% CI) | 0.59 (0.49-0.70) | 0.50 (0.41-0.60) | 0.50 (0.41-0.60) | 0.54 (0.44-0.64) | 0.54 (0.44-0.64) |
| **South Region** |  |  |  |  |  |
| Numbers (yes/total) | 163/28185 | 162/28194 | 154/29693 | 172/30086 | 168/30602 |
| Percentage (95% CI) | 0.58 (0.49-0.67) | 0.57 (0.49-0.67) | 0.52 (0.44-0.61) | 0.57 (0.49-0.66) | 0.55 (0.47-0.64) |
| **Central Region** |  |  |  |  |  |
| Numbers (yes/total) | 145/27803 | 157/27387 | 159/29140 | 162/29221 | 141/29272 |
| Percentage (95% CI) | 0.52 (0.44-0.61) | 0.57 (0.49-0.67) | 0.55 (0.46-0.64) | 0.55 (0.47-0.65) | 0.48 (0.41-0.57) |
| **North Region** |  |  |  |  |  |
| Numbers (yes/total) | 79/14021 | 84/13883 | 83/14431 | 63/14446 | 66/14500 |
| Percentage (95% CI) | 0.56 (0.45-0.70) | 0.61 (0.48-0.75) | 0.58 (0.46-0.71) | 0.44 (0.34-0.56) | 0.46 (0.35-0.58) |

**Supplementary Table 11. One-year incidence of major bleeding in patients with prevalent atrial fibrillation**

|  | **2017** | **2018** | **2019** | **2020** | **2021** |
| --- | --- | --- | --- | --- | --- |
| **Denmark** |  |  |  |  |  |
| Numbers (yes/total) | 2961/129171 | 2906/127722 | 2966/132871 | 2938/133060 | 2966/133661 |
| Percentage (95% CI) | 2.29 (2.21-2.38) | 2.28 (2.19-2.36) | 2.23 (2.15-2.31) | 2.21 (2.13-2.29) | 2.22 (2.14-2.30) |
| **Capital Region** |  |  |  |  |  |
| Numbers (yes/total) | 901/37510 | 877/36603 | 918/37846 | 851/37462 | 865/37093 |
| Percentage (95% CI) | 2.40 (2.25-2.56) | 2.40 (2.24-2.56) | 2.43 (2.27-2.59) | 2.27 (2.12-2.43) | 2.33 (2.18-2.49) |
| **Zealand Region** |  |  |  |  |  |
| Numbers (yes/total) | 537/21637 | 490/21639 | 476/21747 | 473/21833 | 457/22183 |
| Percentage (95% CI) | 2.48 (2.28-2.70) | 2.26 (2.07-2.47) | 2.00 (2.00-2.39) | 2.17 (1.98-2.37) | 2.06 (1.88-2.26) |
| **South Region** |  |  |  |  |  |
| Numbers (yes/total) | 611/28185 | 648/28194 | 683/29693 | 696/30086 | 745/30602 |
| Percentage (95% CI) | 2.17 (2.00-2.34) | 2.30 (2.13-2.48) | 2.30 (2.13-2.48) | 2.31 (2.15-2.49) | 2.43 (2.26-2.61) |
| **Central Region** |  |  |  |  |  |
| Numbers (yes/total) | 591/27803 | 565/27387 | 557/29140 | 610/29221 | 577/29272 |
| Percentage (95% CI) | 2.13 (1.96-2.30) | 2.06 (1.90-2.24) | 1.91 (1.76-2.08) | 2.09 (1.93-2.26) | 1.97 (1.81-2.14) |
| **North Region** |  |  |  |  |  |
| Numbers (yes/total) | 321/14021 | 326/13883 | 332/14431 | 308/14446 | 322/14500 |
| Percentage (95% CI) | 2.29 (2.05-2.55) | 2.35 (2.10-2.61) | 2.30 (2.06-2.56) | 2.13 (1.90-2.38) | 2.22 (1.99-2.47) |
